# Supplementary material
Source: publisher figshare collection journal article supplement (https://acs.figshare.com/ndownloader/files/4499944)
Supplement: Supplementary file 1 [file 4499944]

#===============================================================================
 data_global
#===============================================================================
_audit_creation_date               '2009-09-15'

# 1. SUBMISSION DETAILS

_publ_contact_author_name        'Xavier F. Le Goff'
_publ_contact_author_address     
;Laboratoire DCPH
Ecole Polytechnique
Route de Saclay
F91128 Palaiseau
France
;
_publ_contact_author_email       xavier-frederic.legoff@polytechnique.edu
_publ_contact_author_phone       330169334413
_publ_contact_author_fax         330169334440

_publ_contact_letter
;
     Please consider this CIF submission for publication as a new structure
     paper in JOURNAL OF ORGANIC CHEMISTRY. The figures, chemical
     structure diagram (scheme), Transfert of Copyright Agreement form and
     structure factors will be sent on receipt of your acknowledgement letter
;
#===============================================================================

# 2. PROCESSING SUMMARY (IUCr Office Use Only)

_journal_date_recd_electronic     ?

_journal_date_to_coeditor         ?
_journal_date_from_coeditor       ?
_journal_date_accepted            ?

_journal_date_printers_first      ?
_journal_date_printers_final      ?
_journal_date_proofs_out          ?
_journal_date_proofs_in           ?


_journal_coeditor_name            ?
_journal_coeditor_code            ?
_journal_coeditor_notes
; ?
;

_journal_techeditor_code          ?
_journal_techeditor_notes
; ?
;

_journal_coden_ASTM               ?
_journal_name_full                ?
_journal_year                     ?
_journal_volume                   ?

_journal_issue                    ?
_journal_page_first               ?
_journal_page_last                ?

_journal_suppl_publ_number        ?
_journal_suppl_publ_pages         ?

#===============================================================================

# 3. TITLE AND AUTHOR LIST

_publ_section_title
;
 Efforts Toward the Total Synthesis of Vinigrol: 
 Synthesis of epi-C8-Dihydrovinigrol.
;
# The loop structure below should contain the names  and addresses of all
# authors, in the required order  of publication. Repeat as necessary.


loop_
_publ_author_name
;
 L. Gentric a
 X.F. Le Goff b
 L. Ricard b
 I. Hanna a
;
_publ_author_address
;
a) Laboratoire de Synthese Organique 
Ecole Polytechnique, CNRS
F-91128 Palaiseau Cedex
France

b) Laboratoire Heteroelements et Coordination, 
Ecole Polytechnique, CNRS
F-91128 Palaiseau Cedex
France
;

#===============================================================================
# 4. TEXT

_publ_section_abstract
; ?
;

_publ_section_comment
; 
;
_publ_section_exptl_prep
;All structures were solved using SIR97 (Altomare et al.) and refined with 
 SHELXL97 (Sheldrick). Figures were drawn with Platon (Spek, 1990). 
;

_publ_section_references
;Altomare, A., Cascarano, G., Giacovazzo, C. & Guagliardi, A.
 (1993) J. Appl. Cryst. 26, 343-350.

 Sheldrick, G.M. SHELXL97. Program for crystal structure
 refinement. University of G\\"ottingen, Germany, 1997.

 Sluis, P. v.d., Spek, A.L. (1990). Acta Cryst. A46, 194-201.

 Spek, A.L. (1990). Acta Cryst. A46, C-34.

 Spek, A. L. J. Appl. Crystallogr. 2003, 36, 7
;


_publ_section_figure_captions
; ?
;

_publ_section_acknowledgements
; ?
;


#===============================================================================
 # If more than one structure is reported, sections 5-10 should be filled in
 # per structure. For each data set, replace the ? in the data_? line below
 # by a unique identifier.


#===============================================================================

#compound 23 
data_c24o5 
 
_audit_creation_method            SHELXL-97 
_chemical_name_systematic 
; 
 ? 
; 
_chemical_name_common             ? 
_chemical_melting_point           ? 
_chemical_formula_moiety          ? 
_chemical_formula_sum 
 'C24 H38 O5' 
_chemical_formula_weight          406.54 
 
loop_ 
 _atom_type_symbol 
 _atom_type_description 
 _atom_type_scat_dispersion_real 
 _atom_type_scat_dispersion_imag 
 _atom_type_scat_source 
 'C'  'C'   0.0033   0.0016 
 'International Tables Vol C Tables 4.2.6.8 and 6.1.1.4' 
 'H'  'H'   0.0000   0.0000 
 'International Tables Vol C Tables 4.2.6.8 and 6.1.1.4' 
 'O'  'O'   0.0106   0.0060 
 'International Tables Vol C Tables 4.2.6.8 and 6.1.1.4' 
 
_symmetry_cell_setting            'Monoclinic'
_symmetry_space_group_name_H-M    'P21/n     '
 
loop_ 
 _symmetry_equiv_pos_as_xyz 
 'x, y, z' 
 '-x+1/2, y+1/2, -z+1/2' 
 '-x, -y, -z' 
 'x-1/2, -y-1/2, z-1/2' 
 
_cell_length_a                    11.4050(10) 
_cell_length_b                    14.6640(10) 
_cell_length_c                    13.7140(10) 
_cell_angle_alpha                 90.00 
_cell_angle_beta                  107.2310(10) 
_cell_angle_gamma                 90.00 
_cell_volume                      2190.6(3) 
_cell_formula_units_Z             4 
_cell_measurement_temperature     150.0(1)
_cell_measurement_reflns_used     4776
_cell_measurement_theta_min        2.910
_cell_measurement_theta_max       30.034
 
_exptl_crystal_description        'block'
_exptl_crystal_colour             'colorless'
_exptl_crystal_size_max           0.22 
_exptl_crystal_size_mid           0.20 
_exptl_crystal_size_min           0.16 
_exptl_crystal_density_meas       ? 
_exptl_crystal_density_diffrn     1.233 
_exptl_crystal_density_method     'not measured' 
_exptl_crystal_F_000              888 
_exptl_absorpt_coefficient_mu     0.084 
_exptl_absorpt_correction_type    'multi-scan'
_exptl_absorpt_correction_T_min   0.9817 
_exptl_absorpt_correction_T_max   0.9866 
_exptl_absorpt_process_details    ? 
 
_exptl_special_details 
; 
 ? 
; 
 
_diffrn_ambient_temperature       150.0(1)
_diffrn_radiation_wavelength      0.71069 
_diffrn_radiation_type            MoK\a 
_diffrn_radiation_source          'fine-focus sealed tube' 
_diffrn_radiation_monochromator   graphite 
_diffrn_measurement_device_type   'KappaCCD'
_diffrn_measurement_method        'phi and omega scans'
_diffrn_detector_area_resol_mean  ? 
_diffrn_standards_number          ? 
_diffrn_standards_interval_count  ? 
_diffrn_standards_interval_time   ? 
_diffrn_standards_decay_%         ? 
_diffrn_reflns_number             10183 
_diffrn_reflns_av_R_equivalents   0.0217 
_diffrn_reflns_av_sigmaI/netI     0.0394 
_diffrn_reflns_limit_h_min        -16 
_diffrn_reflns_limit_h_max        16 
_diffrn_reflns_limit_k_min        -20 
_diffrn_reflns_limit_k_max        17 
_diffrn_reflns_limit_l_min        -19 
_diffrn_reflns_limit_l_max        19 
_diffrn_reflns_theta_min          3.09 
_diffrn_reflns_theta_max          30.03 
_reflns_number_total              6309 
_reflns_number_gt                 4911 
_reflns_threshold_expression      >2sigma(I) 
 
_computing_data_collection        ? 
_computing_cell_refinement        ? 
_computing_data_reduction         ? 
_computing_structure_solution     'SHELXS-97 (Sheldrick, 1990)' 
_computing_structure_refinement   'SHELXL-97 (Sheldrick, 1997)' 
_computing_molecular_graphics     ? 
_computing_publication_material   ? 
 
_refine_special_details 
; 
 Refinement of F^2^ against ALL reflections.  The weighted R-factor wR and 
 goodness of fit S are based on F^2^, conventional R-factors R are based 
 on F, with F set to zero for negative F^2^. The threshold expression of 
 F^2^ > 2sigma(F^2^) is used only for calculating R-factors(gt) etc. and is 
 not relevant to the choice of reflections for refinement.  R-factors based 
 on F^2^ are statistically about twice as large as those based on F, and R- 
 factors based on ALL data will be even larger. 
; 
 
_refine_ls_structure_factor_coef  Fsqd  
_refine_ls_matrix_type            full 
_refine_ls_weighting_scheme       calc  
_refine_ls_weighting_details 
 'calc w=1/[\s^2^(Fo^2^)+(0.0546P)^2^+0.2546P] where P=(Fo^2^+2Fc^2^)/3' 
_atom_sites_solution_primary      direct 
_atom_sites_solution_secondary    difmap 
_atom_sites_solution_hydrogens    geom 
_refine_ls_hydrogen_treatment     mixed 
_refine_ls_extinction_method      SHELXL 
_refine_ls_extinction_coef        0.0074(17) 
_refine_ls_extinction_expression 
 'Fc^*^=kFc[1+0.001xFc^2^\l^3^/sin(2\q)]^-1/4^' 
_refine_ls_number_reflns          6309 
_refine_ls_number_parameters      269 
_refine_ls_number_restraints      0 
_refine_ls_R_factor_all           0.0566 
_refine_ls_R_factor_gt            0.0411 
_refine_ls_wR_factor_ref          0.1173 
_refine_ls_wR_factor_gt           0.1090 
_refine_ls_goodness_of_fit_ref    1.064 
_refine_ls_restrained_S_all       1.064 
_refine_ls_shift/su_max           0.001 
_refine_ls_shift/su_mean          0.000 
 
loop_ 
 _atom_site_label 
 _atom_site_type_symbol 
 _atom_site_fract_x 
 _atom_site_fract_y 
 _atom_site_fract_z 
 _atom_site_U_iso_or_equiv 
 _atom_site_adp_type 
 _atom_site_occupancy 
 _atom_site_symmetry_multiplicity 
 _atom_site_calc_flag 
 _atom_site_refinement_flags 
 _atom_site_disorder_assembly 
 _atom_site_disorder_group 
O1 O 0.04280(7) 0.25223(5) 0.73467(6) 0.03130(19) Uani 1 1 d . . . 
O2 O 0.08853(7) 0.34411(4) 0.62264(6) 0.02426(16) Uani 1 1 d . . . 
O3 O 0.07189(9) 0.19311(5) 0.59236(7) 0.0400(2) Uani 1 1 d . . . 
O4 O 0.34507(6) 0.38016(4) 0.65576(5) 0.02213(16) Uani 1 1 d . . . 
O5 O 0.37765(7) 0.49923(5) 0.55370(6) 0.02684(17) Uani 1 1 d . . . 
C1 C 0.26684(10) 0.40541(7) 0.89614(8) 0.0241(2) Uani 1 1 d . . . 
H1 H 0.3498 0.3771 0.9244 0.029 Uiso 1 1 calc R . . 
C2 C 0.18287(11) 0.34247(8) 0.93551(9) 0.0309(2) Uani 1 1 d . . . 
H2A H 0.2092 0.2786 0.9316 0.037 Uiso 1 1 calc R . . 
H2B H 0.1944 0.3566 1.0083 0.037 Uiso 1 1 calc R . . 
C3 C 0.04646(11) 0.34976(8) 0.87791(9) 0.0328(3) Uani 1 1 d . . . 
H3A H 0.0026 0.2997 0.9008 0.039 Uiso 1 1 calc R . . 
H3B H 0.0150 0.4080 0.8967 0.039 Uiso 1 1 calc R . . 
C4 C 0.01579(10) 0.34553(7) 0.76252(9) 0.0269(2) Uani 1 1 d . . . 
C5 C 0.10170(9) 0.40016(6) 0.71531(7) 0.02093(19) Uani 1 1 d . . . 
C6 C 0.23768(9) 0.39074(6) 0.77940(7) 0.02064(19) Uani 1 1 d . . . 
H6 H 0.2561 0.3247 0.7730 0.025 Uiso 1 1 calc R . . 
C7 C 0.32756(9) 0.44020(6) 0.73311(7) 0.0216(2) Uani 1 1 d . . . 
H7 H 0.4079 0.4472 0.7874 0.026 Uiso 1 1 calc R . . 
C8 C 0.28528(10) 0.53441(6) 0.68850(8) 0.0241(2) Uani 1 1 d . . . 
H8 H 0.2942 0.5779 0.7464 0.029 Uiso 1 1 calc R . . 
C9 C 0.15150(10) 0.53473(7) 0.62330(8) 0.0251(2) Uani 1 1 d . . . 
H9A H 0.1448 0.4992 0.5605 0.030 Uiso 1 1 calc R . . 
H9B H 0.1276 0.5983 0.6024 0.030 Uiso 1 1 calc R . . 
C10 C 0.05914(9) 0.49581(6) 0.67433(8) 0.0216(2) Uani 1 1 d . . . 
H10 H -0.0170 0.4849 0.6165 0.026 Uiso 1 1 calc R . . 
C11 C 0.01688(9) 0.55958(7) 0.74831(8) 0.0235(2) Uani 1 1 d . . . 
H11 H -0.0205 0.5179 0.7886 0.028 Uiso 1 1 calc R . . 
C12 C 0.11341(10) 0.61460(7) 0.82872(8) 0.0268(2) Uani 1 1 d . . . 
H12A H 0.1777 0.6340 0.7979 0.032 Uiso 1 1 calc R . . 
H12B H 0.0734 0.6706 0.8437 0.032 Uiso 1 1 calc R . . 
C13 C 0.17687(11) 0.56735(8) 0.93036(9) 0.0324(2) Uani 1 1 d . . . 
H13A H 0.2052 0.6158 0.9823 0.039 Uiso 1 1 calc R . . 
H13B H 0.1132 0.5321 0.9498 0.039 Uiso 1 1 calc R . . 
C14 C 0.28516(10) 0.50340(7) 0.94032(8) 0.0271(2) Uani 1 1 d . . . 
H14 H 0.3397 0.5349 0.9057 0.033 Uiso 1 1 calc R . . 
C15 C -0.12103(10) 0.35924(8) 0.70981(11) 0.0364(3) Uani 1 1 d . . . 
H15A H -0.1368 0.3564 0.6356 0.055 Uiso 1 1 calc R . . 
H15B H -0.1464 0.4189 0.7286 0.055 Uiso 1 1 calc R . . 
H15C H -0.1677 0.3112 0.7313 0.055 Uiso 1 1 calc R . . 
C16 C 0.06817(10) 0.25748(7) 0.64472(9) 0.0288(2) Uani 1 1 d . . . 
C17 C 0.36908(11) 0.56611(7) 0.62686(9) 0.0306(2) Uani 1 1 d . . . 
H17A H 0.3368 0.6236 0.5912 0.037 Uiso 1 1 calc R . . 
H17B H 0.4520 0.5785 0.6737 0.037 Uiso 1 1 calc R . . 
C18 C 0.35871(12) 0.49818(9) 1.05381(9) 0.0359(3) Uani 1 1 d . . . 
H18A H 0.3884 0.5592 1.0785 0.054 Uiso 1 1 calc R . . 
H18B H 0.4288 0.4571 1.0624 0.054 Uiso 1 1 calc R . . 
H18C H 0.3059 0.4750 1.0930 0.054 Uiso 1 1 calc R . . 
C19 C -0.09036(11) 0.62202(8) 0.68789(9) 0.0332(3) Uani 1 1 d . . . 
H19 H -0.1407 0.5856 0.6286 0.040 Uiso 1 1 calc R . . 
C20 C -0.05211(14) 0.70896(9) 0.64452(10) 0.0437(3) Uani 1 1 d . . . 
H20A H -0.1252 0.7451 0.6110 0.066 Uiso 1 1 calc R . . 
H20B H -0.0091 0.6931 0.5947 0.066 Uiso 1 1 calc R . . 
H20C H 0.0026 0.7446 0.7000 0.066 Uiso 1 1 calc R . . 
C21 C -0.17380(12) 0.64557(9) 0.75341(12) 0.0445(3) Uani 1 1 d . . . 
H21A H -0.1275 0.6811 0.8129 0.067 Uiso 1 1 calc R . . 
H21B H -0.2036 0.5892 0.7763 0.067 Uiso 1 1 calc R . . 
H21C H -0.2438 0.6815 0.7130 0.067 Uiso 1 1 calc R . . 
C22 C 0.42278(9) 0.41405(7) 0.59960(8) 0.0230(2) Uani 1 1 d . . . 
C23 C 0.55655(10) 0.42116(8) 0.66456(9) 0.0322(2) Uani 1 1 d . . . 
H23A H 0.5630 0.4633 0.7213 0.048 Uiso 1 1 calc R . . 
H23B H 0.6064 0.4439 0.6225 0.048 Uiso 1 1 calc R . . 
H23C H 0.5863 0.3608 0.6916 0.048 Uiso 1 1 calc R . . 
C24 C 0.40831(11) 0.34814(7) 0.51240(8) 0.0290(2) Uani 1 1 d . . . 
H24A H 0.4415 0.2885 0.5393 0.043 Uiso 1 1 calc R . . 
H24B H 0.4530 0.3712 0.4665 0.043 Uiso 1 1 calc R . . 
H24C H 0.3211 0.3419 0.4747 0.043 Uiso 1 1 calc R . . 
 
loop_ 
 _atom_site_aniso_label 
 _atom_site_aniso_U_11 
 _atom_site_aniso_U_22 
 _atom_site_aniso_U_33 
 _atom_site_aniso_U_23 
 _atom_site_aniso_U_13 
 _atom_site_aniso_U_12 
O1 0.0335(4) 0.0202(3) 0.0407(5) 0.0013(3) 0.0118(4) -0.0042(3) 
O2 0.0267(4) 0.0191(3) 0.0257(4) -0.0033(3) 0.0057(3) -0.0006(3) 
O3 0.0487(5) 0.0224(4) 0.0458(5) -0.0072(3) 0.0092(4) 0.0002(4) 
O4 0.0235(3) 0.0213(3) 0.0243(4) -0.0006(3) 0.0114(3) -0.0008(3) 
O5 0.0329(4) 0.0230(3) 0.0288(4) 0.0027(3) 0.0155(3) 0.0024(3) 
C1 0.0256(5) 0.0255(4) 0.0211(5) 0.0032(4) 0.0068(4) 0.0017(4) 
C2 0.0378(6) 0.0310(5) 0.0260(5) 0.0062(4) 0.0125(5) -0.0016(5) 
C3 0.0355(6) 0.0321(5) 0.0368(6) 0.0056(5) 0.0200(5) -0.0045(5) 
C4 0.0250(5) 0.0221(4) 0.0353(6) 0.0005(4) 0.0115(4) -0.0037(4) 
C5 0.0218(5) 0.0194(4) 0.0217(5) -0.0015(3) 0.0067(4) -0.0017(4) 
C6 0.0215(5) 0.0197(4) 0.0211(5) 0.0018(3) 0.0070(4) 0.0007(4) 
C7 0.0219(5) 0.0224(4) 0.0216(5) -0.0017(4) 0.0080(4) -0.0018(4) 
C8 0.0295(5) 0.0195(4) 0.0267(5) -0.0019(4) 0.0136(4) -0.0030(4) 
C9 0.0314(5) 0.0212(4) 0.0250(5) 0.0039(4) 0.0116(4) 0.0044(4) 
C10 0.0227(5) 0.0195(4) 0.0220(5) -0.0002(3) 0.0057(4) 0.0005(4) 
C11 0.0243(5) 0.0224(4) 0.0243(5) -0.0014(4) 0.0077(4) 0.0015(4) 
C12 0.0291(5) 0.0240(5) 0.0265(5) -0.0047(4) 0.0069(4) 0.0024(4) 
C13 0.0366(6) 0.0328(5) 0.0254(5) -0.0066(4) 0.0058(5) 0.0020(5) 
C14 0.0289(5) 0.0302(5) 0.0206(5) -0.0018(4) 0.0047(4) -0.0009(4) 
C15 0.0230(5) 0.0340(6) 0.0527(8) -0.0010(5) 0.0120(5) -0.0062(5) 
C16 0.0273(5) 0.0206(4) 0.0350(6) -0.0014(4) 0.0039(4) -0.0011(4) 
C17 0.0388(6) 0.0220(4) 0.0385(6) -0.0014(4) 0.0232(5) -0.0033(4) 
C18 0.0361(6) 0.0432(6) 0.0235(5) -0.0024(5) 0.0013(5) 0.0013(5) 
C19 0.0295(6) 0.0325(5) 0.0332(6) -0.0070(4) 0.0026(5) 0.0098(5) 
C20 0.0553(8) 0.0380(6) 0.0382(7) 0.0077(5) 0.0144(6) 0.0226(6) 
C21 0.0334(6) 0.0416(7) 0.0604(9) -0.0097(6) 0.0167(6) 0.0087(5) 
C22 0.0233(5) 0.0239(4) 0.0241(5) 0.0019(4) 0.0105(4) 0.0005(4) 
C23 0.0231(5) 0.0435(6) 0.0306(6) 0.0014(5) 0.0089(4) -0.0024(5) 
C24 0.0328(6) 0.0285(5) 0.0288(5) -0.0021(4) 0.0140(5) 0.0009(4) 
 
_geom_special_details 
; 
 All esds (except the esd in the dihedral angle between two l.s. planes) 
 are estimated using the full covariance matrix.  The cell esds are taken 
 into account individually in the estimation of esds in distances, angles 
 and torsion angles; correlations between esds in cell parameters are only 
 used when they are defined by crystal symmetry.  An approximate (isotropic) 
 treatment of cell esds is used for estimating esds involving l.s. planes. 
; 
 
loop_ 
 _geom_bond_atom_site_label_1 
 _geom_bond_atom_site_label_2 
 _geom_bond_distance 
 _geom_bond_site_symmetry_2 
 _geom_bond_publ_flag 
O1 C16 1.3501(14) . ? 
O1 C4 1.4771(12) . ? 
O2 C16 1.3421(12) . ? 
O2 C5 1.4834(12) . ? 
O3 C16 1.1944(13) . ? 
O4 C22 1.4248(11) . ? 
O4 C7 1.4373(11) . ? 
O5 C22 1.4246(12) . ? 
O5 C17 1.4270(12) . ? 
C1 C2 1.5385(14) . ? 
C1 C14 1.5492(14) . ? 
C1 C6 1.5507(14) . ? 
C2 C3 1.5256(17) . ? 
C3 C4 1.5173(16) . ? 
C4 C15 1.5263(15) . ? 
C4 C5 1.5482(14) . ? 
C5 C10 1.5353(13) . ? 
C5 C6 1.5457(14) . ? 
C6 C7 1.5379(13) . ? 
C7 C8 1.5300(14) . ? 
C8 C9 1.5229(15) . ? 
C8 C17 1.5240(14) . ? 
C9 C10 1.5368(14) . ? 
C10 C11 1.5575(13) . ? 
C11 C12 1.5361(14) . ? 
C11 C19 1.5557(14) . ? 
C12 C13 1.5327(15) . ? 
C13 C14 1.5243(16) . ? 
C14 C18 1.5357(15) . ? 
C19 C20 1.5243(18) . ? 
C19 C21 1.5293(17) . ? 
C22 C24 1.5082(14) . ? 
C22 C23 1.5255(15) . ? 
 
loop_ 
 _geom_angle_atom_site_label_1 
 _geom_angle_atom_site_label_2 
 _geom_angle_atom_site_label_3 
 _geom_angle 
 _geom_angle_site_symmetry_1 
 _geom_angle_site_symmetry_3 
 _geom_angle_publ_flag 
C16 O1 C4 107.52(7) . . ? 
C16 O2 C5 108.15(8) . . ? 
C22 O4 C7 115.47(7) . . ? 
C22 O5 C17 112.52(8) . . ? 
C2 C1 C14 116.43(9) . . ? 
C2 C1 C6 108.28(8) . . ? 
C14 C1 C6 119.69(8) . . ? 
C3 C2 C1 114.93(9) . . ? 
C4 C3 C2 114.95(9) . . ? 
O1 C4 C3 107.83(9) . . ? 
O1 C4 C15 105.18(8) . . ? 
C3 C4 C15 112.09(9) . . ? 
O1 C4 C5 99.49(8) . . ? 
C3 C4 C5 115.84(9) . . ? 
C15 C4 C5 114.75(9) . . ? 
O2 C5 C10 104.58(7) . . ? 
O2 C5 C6 105.52(7) . . ? 
C10 C5 C6 116.43(8) . . ? 
O2 C5 C4 98.95(7) . . ? 
C10 C5 C4 117.08(8) . . ? 
C6 C5 C4 111.63(8) . . ? 
C7 C6 C5 113.72(8) . . ? 
C7 C6 C1 113.29(8) . . ? 
C5 C6 C1 116.54(8) . . ? 
O4 C7 C8 110.74(8) . . ? 
O4 C7 C6 105.73(7) . . ? 
C8 C7 C6 114.91(8) . . ? 
C9 C8 C17 110.93(9) . . ? 
C9 C8 C7 112.32(8) . . ? 
C17 C8 C7 108.79(8) . . ? 
C8 C9 C10 115.73(8) . . ? 
C5 C10 C9 108.72(8) . . ? 
C5 C10 C11 115.81(8) . . ? 
C9 C10 C11 117.37(8) . . ? 
C12 C11 C19 110.88(8) . . ? 
C12 C11 C10 119.25(8) . . ? 
C19 C11 C10 110.64(8) . . ? 
C13 C12 C11 117.41(9) . . ? 
C14 C13 C12 120.76(9) . . ? 
C13 C14 C18 107.83(9) . . ? 
C13 C14 C1 121.58(9) . . ? 
C18 C14 C1 108.67(9) . . ? 
O3 C16 O2 124.97(11) . . ? 
O3 C16 O1 124.03(10) . . ? 
O2 C16 O1 111.00(8) . . ? 
O5 C17 C8 111.42(8) . . ? 
C20 C19 C21 109.89(10) . . ? 
C20 C19 C11 115.43(10) . . ? 
C21 C19 C11 110.35(10) . . ? 
O5 C22 O4 110.09(8) . . ? 
O5 C22 C24 105.73(8) . . ? 
O4 C22 C24 105.40(8) . . ? 
O5 C22 C23 111.48(8) . . ? 
O4 C22 C23 112.51(8) . . ? 
C24 C22 C23 111.25(9) . . ? 
 
_diffrn_measured_fraction_theta_max    0.985 
_diffrn_reflns_theta_full              30.03 
_diffrn_measured_fraction_theta_full   0.985 
_refine_diff_density_max    0.288 
_refine_diff_density_min   -0.208 
_refine_diff_density_rms    0.039 
